# Supplementary material for: Endoplasmic Reticulum Stress Signalling Induces Casein Kinase 1-Dependent Formation of Cytosolic TDP-43 Inclusions in Motor Neuron-Like Cells
Source: PubMed Central journal article supplement (PMC7260270; doi:10.1007/s11064-019-02832-2), 2019-07-06
Supplement: 11064_2019_2832_MOESM1_ESM.pdf [file 11064_2019_2832_MOESM1_ESM.pdf]

Endoplasmic reticulum stress signalling induces casein kinase 1-dependent formation of cytosolic TDP-43 inclusions in motor neuron-like cells

David A. Hicks<sup>1,2\*</sup>, Laura L. Cross<sup>1</sup>, Ritchie Williamson<sup>1</sup>, and Marcus Rattray<sup>1\*</sup>

<sup>1</sup>*School of Pharmacy and Medical Sciences, Faculty of Life Sciences, University of Bradford, Richmond Road, Bradford, BD7 1DP, United Kingdom*

<sup>2</sup>*Current address: Division of Neuroscience & Experimental Psychology, School of Biological Sciences, Faculty of Biology, Medicine and Health, University of Manchester, Oxford Road, Manchester, M13 9PT*

\*To whom correspondence and reprint requests should be addressed:

**David A. Hicks**, Faculty of Biology, Medicine and Health, AV Hill Building, University of Manchester; [david.hicks-2@manchester.ac.uk](mailto:david.hicks-2@manchester.ac.uk); Tel +44 (0)161 3060502; ORCID: [0000-0001-6045-1063](https://orcid.org/0000-0001-6045-1063)

**Marcus Rattray**, School of Pharmacy and Medical Sciences, Faculty of Life Sciences, University of Bradford; [m.rattray@bradford.ac.uk](mailto:m.rattray@bradford.ac.uk); Tel +44 (0)1274 234675

Running title: Induction of TDP-43 cytoplasmic accumulation

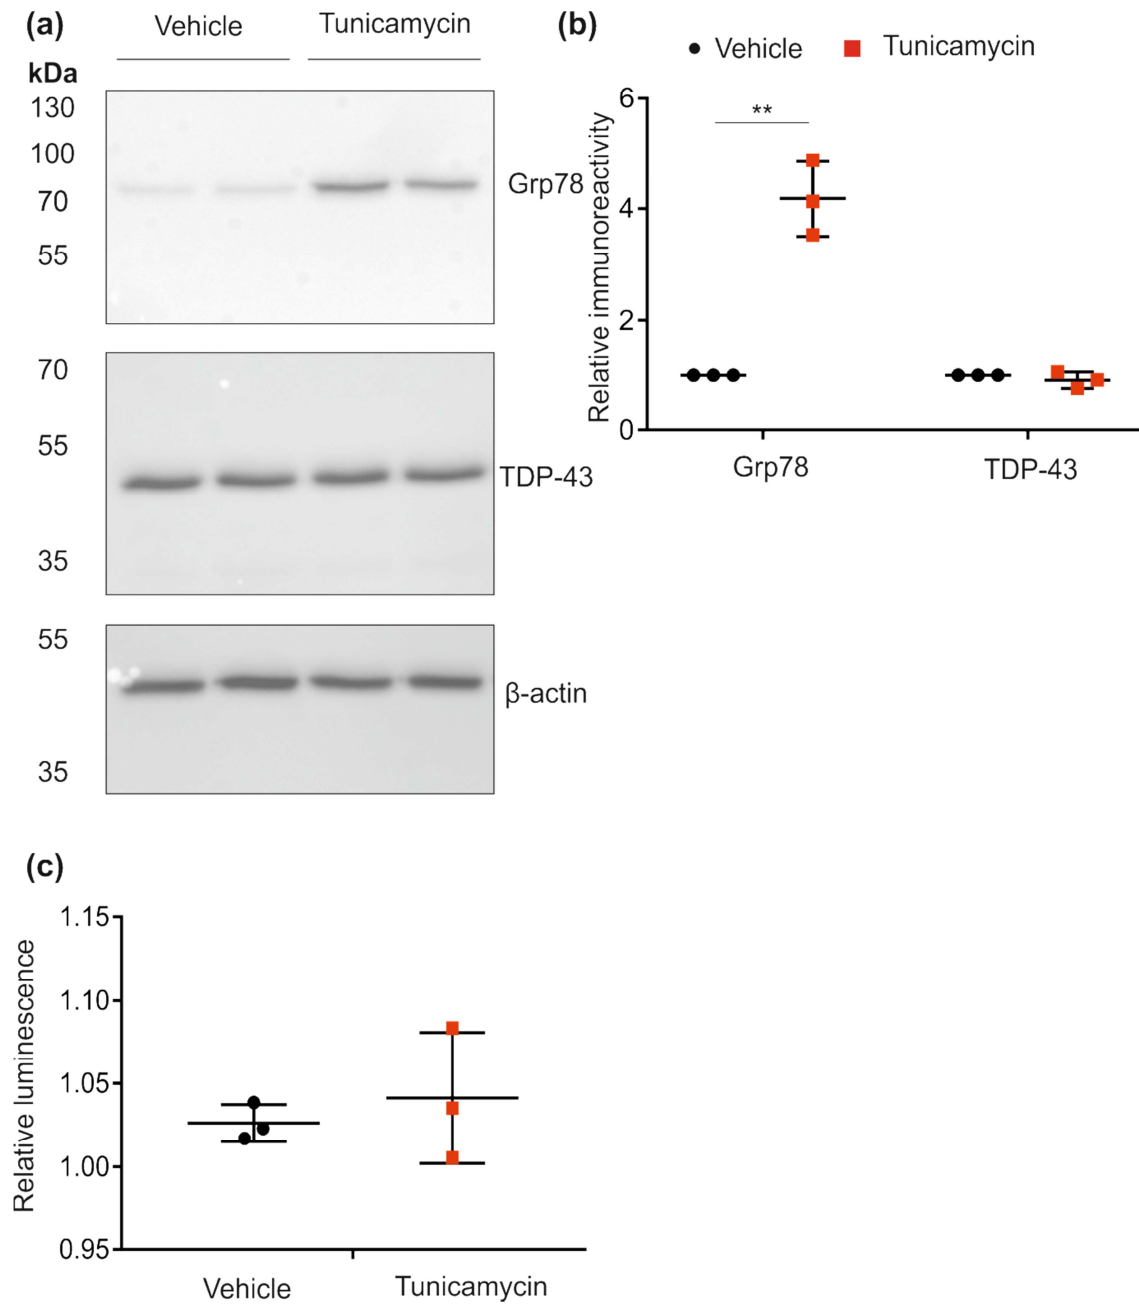

**Figure S1**

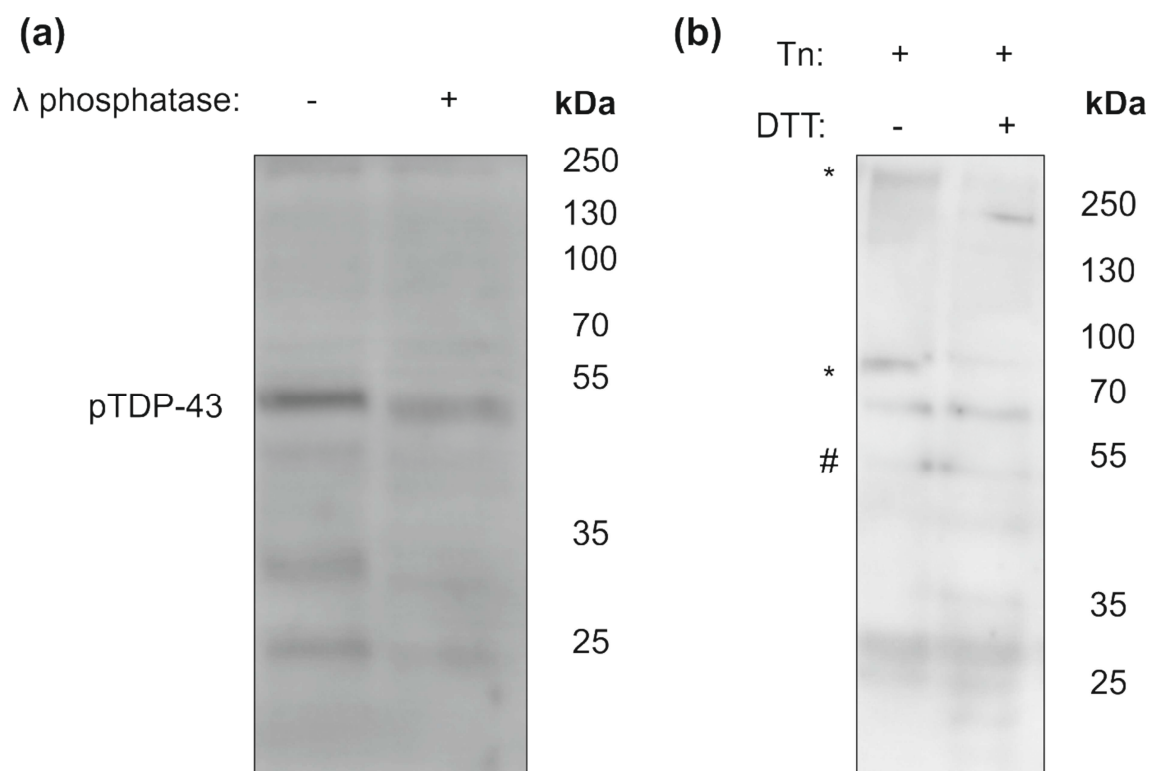

**Figure S2**
